# Supplementary material for: Estimating the fitness cost and benefit of antimicrobial resistance from pathogen genomic data
Source: bioRxiv or medRxiv preprint supplement (doi:10.1101/2022.12.02.518824), 2023-05-16
Supplement: Supplementary file [file media-1.pdf]

# Estimating the fitness cost and benefit of antimicrobial resistance from pathogen genomic data: Supplementary Material

David Helekal, Matt Keeling, Yonatan H Grad, Xavier Didelot

## Supplementary information for detailed analysis of a single simulated dataset

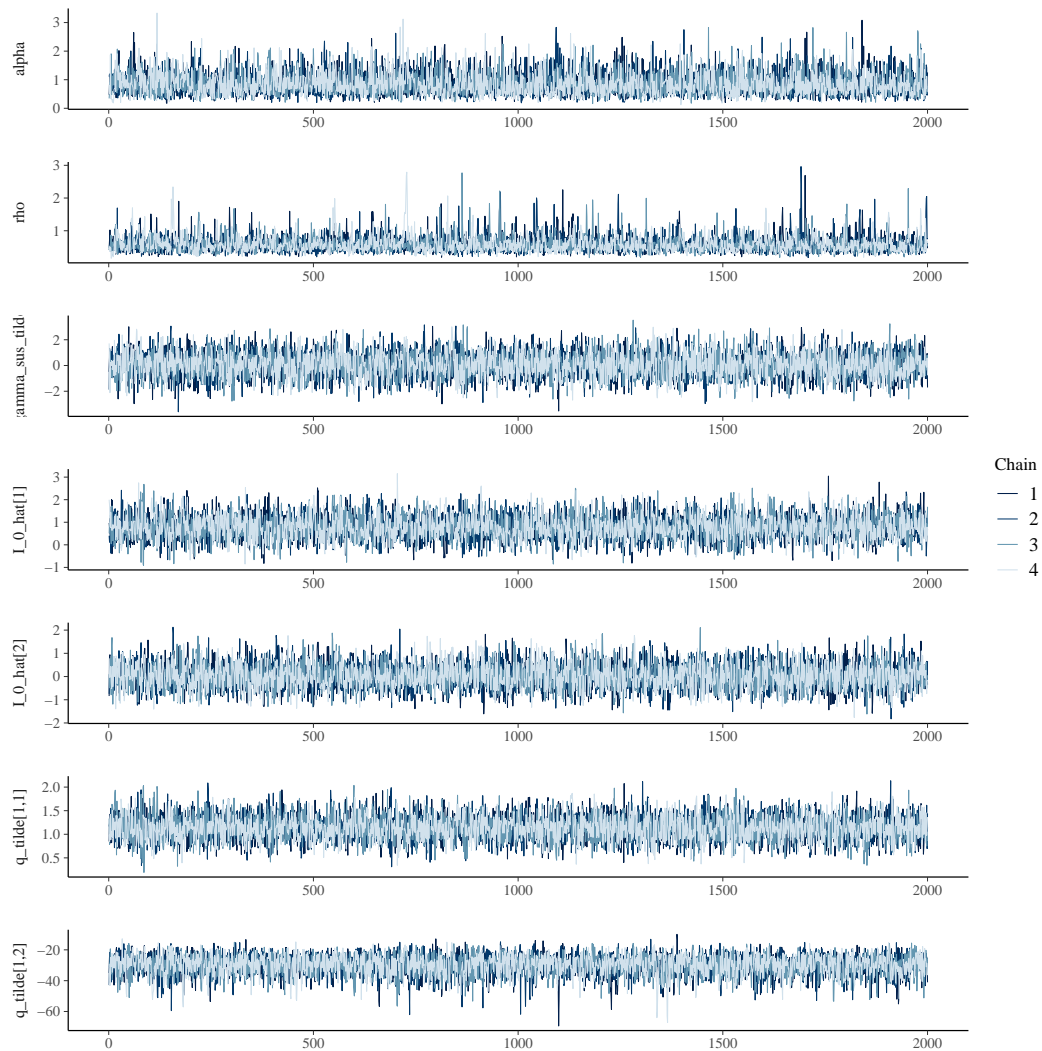

Figure S1: Traces for all parameters excluding GP inducing variables  $f_1 : m$  for analysis of single simulated dataset.

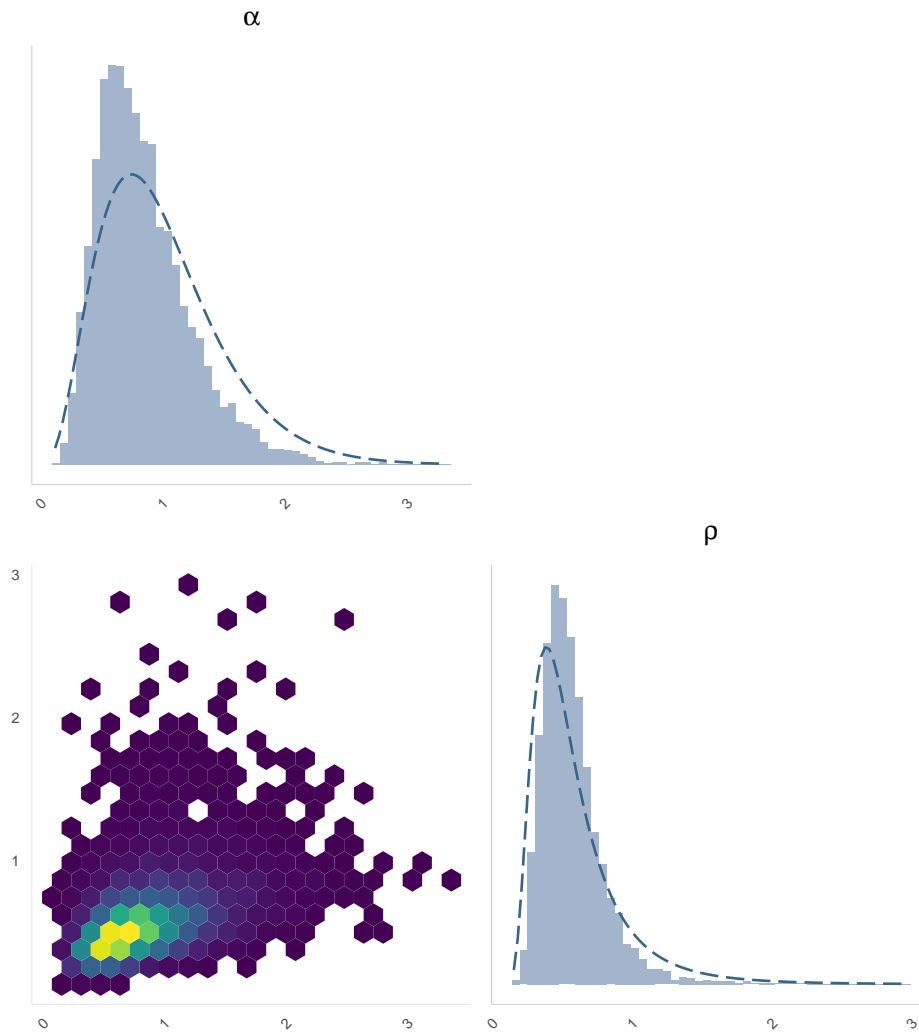

Figure S2: Marginal and joint distributions for hyperparameters  $\rho$  and  $\alpha$  for the analysis of a single simulated dataset.

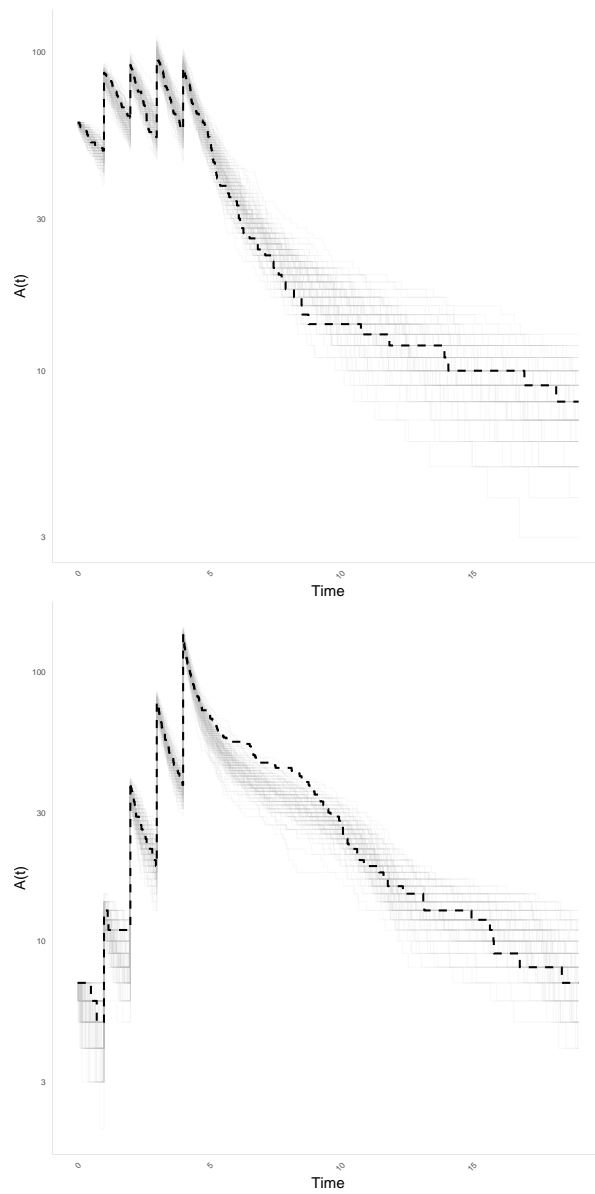

Figure S3: Posterior predictive trajectories of  $A(t)$  for the susceptible (top) and resistant (bottom) lineages in the analysis of single simulated dataset.

# Supplementary information for resistance parameter recovery

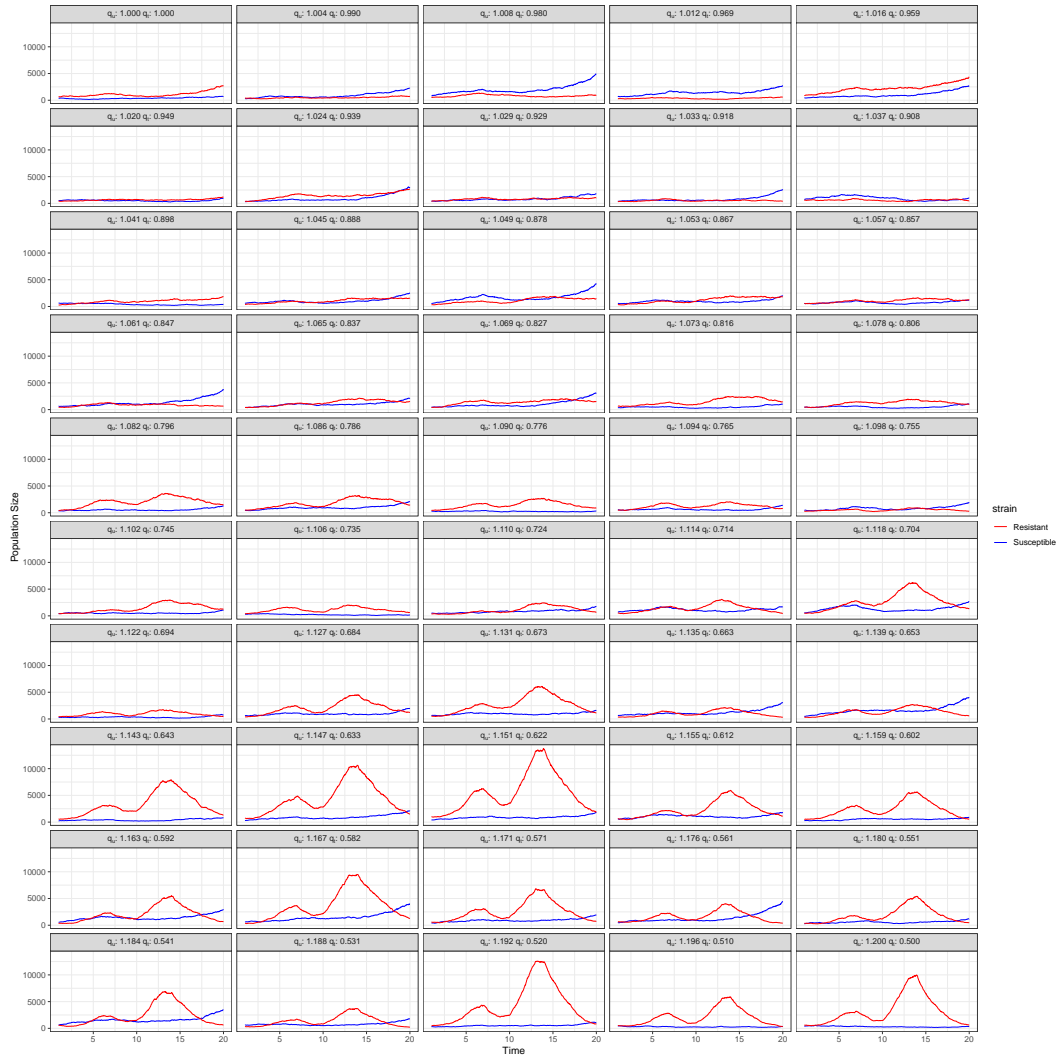

Figure S4: Trajectories of observed lineages used for parameter recovery validation.

# Supplementary information for analysis of *Neisseria gonorrhoeae* dataset

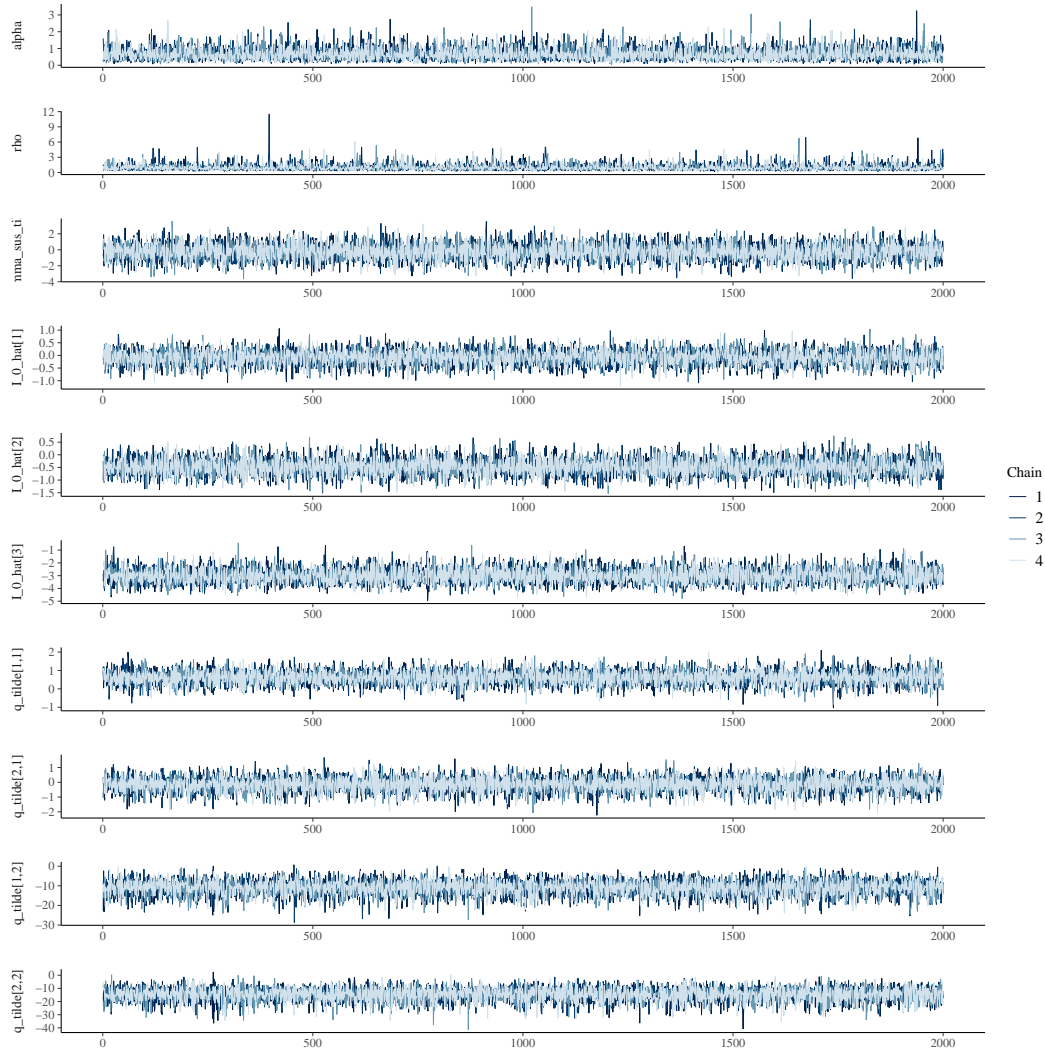

Figure S5: Traces for all parameters excluding GP inducing variables  $f_1 : m$  for the analysis of *N. gonorrhoeae*.

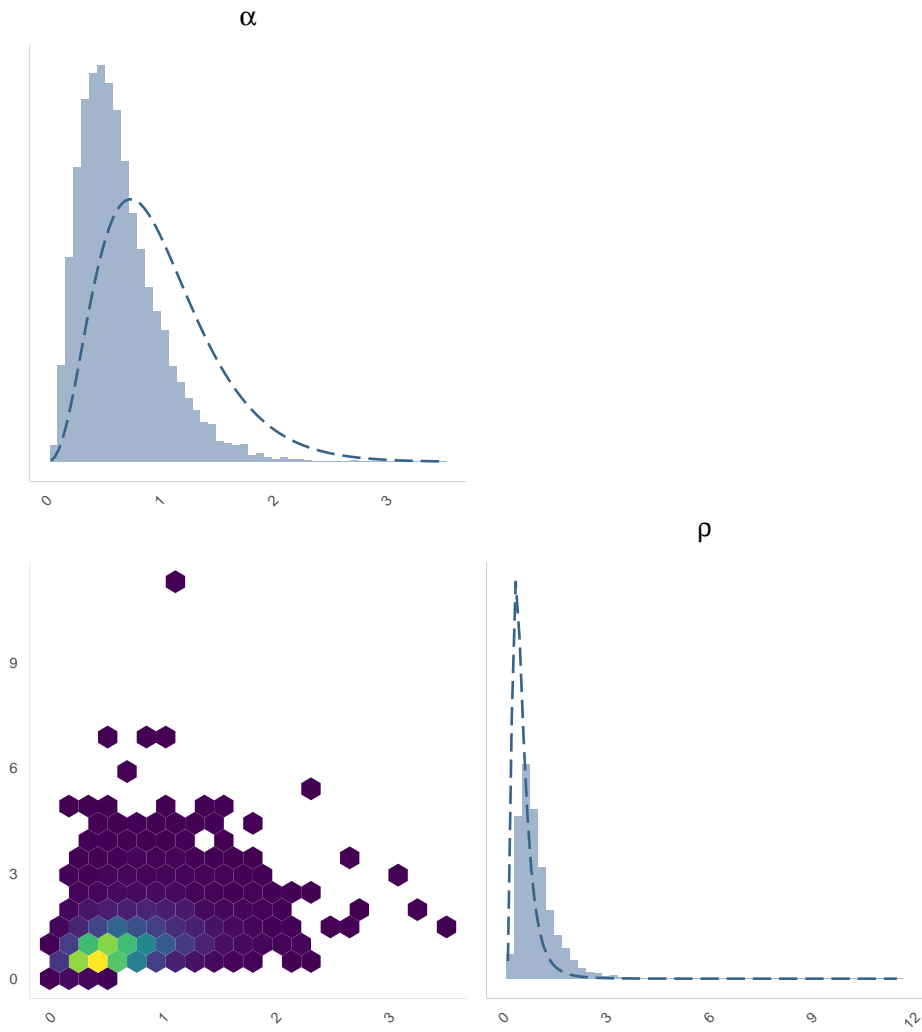

Figure S6: Marginal and joint distributions for hyperparameters  $\rho$  and  $\alpha$  for the analysis of *N. gonorrhoeae*.

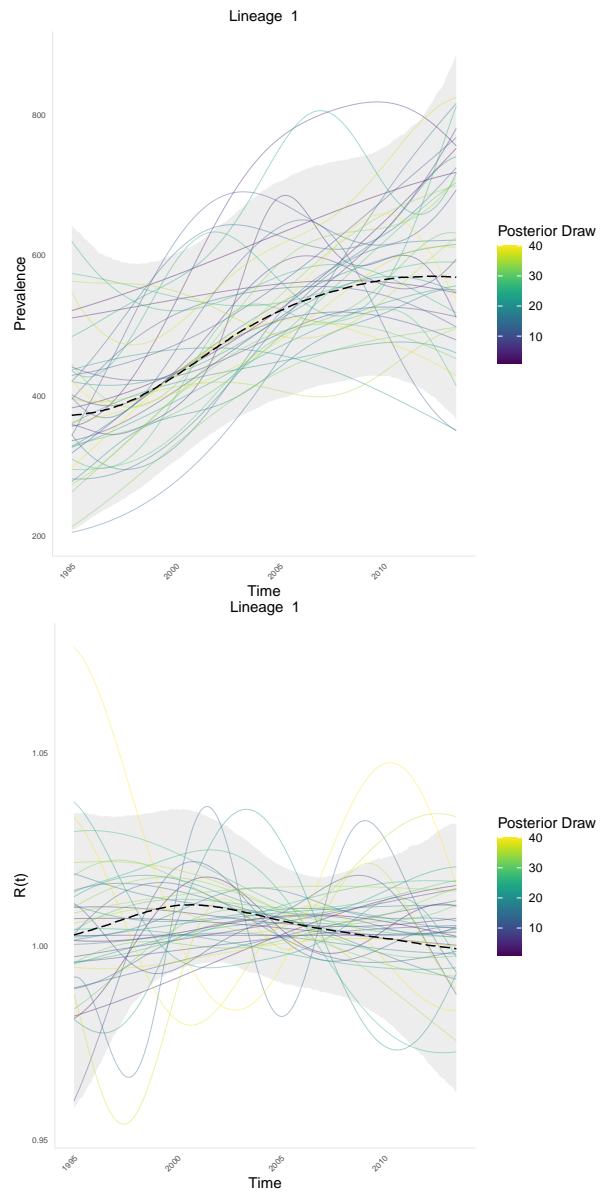

Figure S7: Estimated susceptible lineage dynamics for *N. gonorrhoeae*.

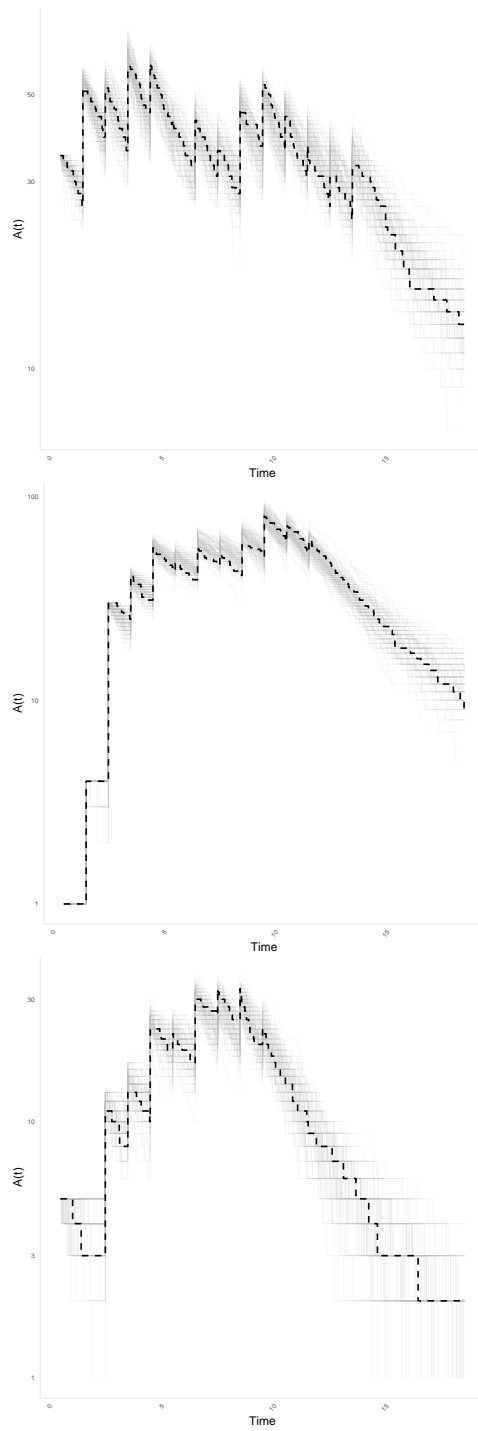

Figure S8: Posterior predictive trajectories of  $A(t)$  for the susceptible lineage (top), resistant lineage 1 (middle) and resistant lineage 2 (bottom) of *N. gonorrhoeae*.
